# Supplementary material
Source: Springer Nature journal article supplement (https://www.springermedizin.de/resource/supplementary/12889_2014_6470_MOESM2_ESM.docx/9498268)
Supplement: MOESM2 [file 9498268]

**FIGURE 2 Key Messages for the intervention**

- Too much salt can lead to high blood pressure and stroke - the leading causes of death and disability in Australia.
- Reduce your salt intake by swapping regular salt for ‘Salt for Life’ - a sea salt blend enriched with potassium to give you 70% less sodium than regular salt.
- Use FoodSwitch to make better food choices for you and your family.
